# Supplementary material
Source: PubMed Central journal article supplement (PMC2194616)
Supplement: endo_en.2007-0906_1.pdf [file endo_en.2007-0906_1.pdf]

## **Supplemental tables**

**Table 1A.** Microarray results of intestinal genes differentially upregulated, under glucose perfusion only, between 20d and 10d old pups.

| access number                                      | symbol  | name and function                                                                   | Mean fold change<br>20G vs 10G | SE    | Frequency |
|----------------------------------------------------|---------|-------------------------------------------------------------------------------------|--------------------------------|-------|-----------|
| <b>Metabolism activity</b>                         |         |                                                                                     |                                |       |           |
| M26854                                             | Cyp2b15 | cytochrome P450, 2b19                                                               | 3.92                           | 2.46  | 5         |
| U39943                                             | C5yp2J3 | cytochrome P450 monooxygenase                                                       | 2.73                           | 1.00  | 5         |
| M73714                                             | Aldh3a2 | aldehyde dehydrogenase family 3, subfamily A2                                       | 2.60                           | 1.10  | 5         |
| X81395                                             | Ces1    | carboxylesterase 1                                                                  | 2.44                           | 0.75  | 4         |
| M58364                                             | Gch     | GTP cyclohydrolase 1                                                                | 2.38                           | 1.26  | 4         |
| M10149                                             | Aldob   | aldolase B                                                                          | 2.26                           | 0.48  | 4         |
| AF170918                                           | Aldh9a1 | aldehyde dehydrogenase family 9, subfamily A1                                       | 2.09                           | 0.40  | 5         |
| D10655                                             | Dlat    | dihydrolipoamide acetyltransferase                                                  | 1.92                           | 0.32  | 4         |
| NM_017272                                          | Aldh1a4 | aldehyde dehydrogenase family 1, subfamily A4                                       | 1.85                           | 0.44  | 5         |
| AF106944                                           | Prdx3   | peroxiredoxin 3                                                                     | 1.85                           | 0.34  | 4         |
| NM_013052                                          | Ywhah   | tyrosine 3-monooxygenase/tryptophan 5-monooxygenase activation protein, polypeptide | 1.64                           | 0.33  | 5         |
| U21662                                             | Mgat2   | mannosyl (alpha-1,6-)-glycoprotein beta-1,2-N-acetylglucosaminyltransferase         | 1.61                           | 0.21  | 4         |
| <b>Transcription activity/transcription factor</b> |         |                                                                                     |                                |       |           |
| NM_012864                                          | Mmp7    | matrix metalloproteinase 7                                                          | 2.06                           | 0.73  | 5         |
| NM_017365                                          | Pdlim1  | PDZ and LIM domain 1                                                                | 1.59                           | 0.22  | 4         |
| D83948                                             | Rbm10   | RNA binding motif protein 10                                                        | 1.55                           | 0.21  | 5         |
| <b>Transporter activity</b>                        |         |                                                                                     |                                |       |           |
| NM_017251                                          | Gjb1    | gap junction membrane channel protein beta 1                                        | 2.55                           | 0.37  | 5         |
| NM_017216                                          | Slc3a1  | neutral amino acid transporter, member 1                                            | 2.30                           | 0.90  | 5         |
| NM_012914                                          | Atp2a3  | ATPase, Ca <sup>++</sup> transporting, ubiquitous                                   | 2.10                           | 0.76  | 5         |
| U01344                                             | Nat2    | N-Acetyltransferase-2                                                               | 1.86                           | 0.27  | 4         |
| NM_013034                                          | Slc6a4  | serotonin transporter                                                               | 1.65                           | 0.16  | 4         |
| NM_017126                                          | Fdx1    | ferredoxin 1                                                                        | 1.64                           | 0.27  | 4         |
| NM_017326                                          | Calm2   | calmodulin 2                                                                        | 1.54                           | 0.14  | 5         |
| <b>Cell communication</b>                          |         |                                                                                     |                                |       |           |
| NM_031971                                          | Hspa1a  | heat shock 70kD protein 1A                                                          | 7.39                           | 11.55 | 5         |
| L08134                                             | Sgp158  | proline-rich glycoprotein (sgp158)                                                  | 2.48                           | 1.26  | 5         |

|                        |         |                                                           |      |      |   |
|------------------------|---------|-----------------------------------------------------------|------|------|---|
| AF260258               | Synj2bp | synaptojanin 2 binding protein                            | 2.34 | 0.75 | 5 |
| NM_013129              | Il15    | interleukin 15                                            | 2.33 | 0.66 | 5 |
| Z11875                 | Muc     | intestinal mucin peptide                                  | 2.27 | 0.59 | 5 |
| AF281661               | Ppp1r1b | protein phosphatase 1, regulatory (inhibitor) subunit 1B  | 2.22 | 1.53 | 4 |
| NM_013222              | Gfer    | growth factor, erv1 -like                                 | 2.19 | 0.50 | 4 |
| NM_019259              | C1qbp   | complement component 1, q subcomponent binding protein    | 1.94 | 0.27 | 5 |
| U09583                 | Frk     | src related tyrosine kinase                               | 1.86 | 0.25 | 4 |
| AB042887               | Ramp1   | receptor (calcitonin) activity modifying protein 1        | 1.86 | 0.35 | 4 |
| NM_013012              | Prkg2   | protein kinase, cGMP- dependent, type II                  | 1.83 | 0.31 | 5 |
| U53922                 | Hsj2    | DnaJ-like protein                                         | 1.77 | 0.39 | 5 |
| AF035951               |         | similar to KIFC1                                          | 1.75 | 0.21 | 5 |
| AB010119               | Tctex1  | t-complex testis expressed 1                              | 1.73 | 0.30 | 4 |
| <b>Immune activity</b> |         |                                                           |      |      |   |
| AF068861               | Defb2   | beta defensin-2                                           | 6.55 | 3.63 | 5 |
| AF115768               |         | similar to Defensin 5 precursor (RD-5) (Enteric defensin) | 5.22 | 3.87 | 5 |
| <b>Unclassified</b>    |         |                                                           |      |      |   |
| U36786                 | VN7     | putative pheromone receptor VN7                           | 1.97 | 0.50 | 4 |
| S78734                 |         | similar to ribosomalprotein S24                           | 1.74 | 0.25 | 4 |
| NM_012609              | Nfl     | neurofibromatosis 1                                       | 1.59 | 0.34 | 4 |

Table 1A shows upregulated genes that changed by more than 1.5 fold in at least four of five samples and whose fold change is significant ( $P < 0.05$ ). Values are mean  $\pm$  SE for each gene;  $n = 5$  experiments. Values indicate the fold increase in the expression of a gene in 20d old G-perfused compared with 10d old G-perfused intestine
