# Supplementary material
Source: PubMed Central journal article supplement (PMC2194616)
Supplement: endo_en.2007-0906_2.pdf [file endo_en.2007-0906_2.pdf]

**Table 2A.** Microarray results of intestinal genes differentially downregulated, under glucose perfusion only, between 20d and 10d old pups

| Access number                                    | Symbol    | Name and function                                                                 | Mean fold change | SE   | Frequency |
|--------------------------------------------------|-----------|-----------------------------------------------------------------------------------|------------------|------|-----------|
| <b>Metabolism</b>                                |           |                                                                                   |                  |      |           |
| AJ005642                                         | bsp2      | brain serine protease                                                             | -2.70            | 2.03 | 5         |
| AB043870                                         | Cln2      | ceroid-lipofuscinosis, neuronal 2                                                 | -2.67            | 0.71 | 5         |
| NM_016986                                        | Acadm     | acetyl-coenzyme A dehydrogenase, medium chain                                     | -2.31            | 0.37 | 5         |
| NM_017127                                        | Chk       | choline kinase                                                                    | -2.27            | 0.47 | 5         |
| NM_012533                                        | Cpb1      | carboxypeptidase B1                                                               | -1.99            | 0.47 | 5         |
| AB010428                                         | Cte1      | cytosolic acyl-CoA thioesterase 1                                                 | -1.86            | 0.31 | 5         |
| NM_017193                                        | Kat2      | kynurenine aminotransferase 2                                                     | -1.84            | 1.05 | 4         |
| U43175                                           | Atp6s14   | ATPase, vacuolar, 14 kD                                                           | -1.74            | 0.67 | 4         |
| X05341                                           | Acaa2     | acetyl-Coenzyme A acyltransferase 2 (mitochondrial 3-oxoacyl-Coenzyme A thiolase) | -1.68            | 0.76 | 4         |
| U53706                                           | Mvd       | mevalonate pyrophosphate decarboxylase                                            | -1.55            | 0.79 | 4         |
| <b>Transcription/traduction activity</b>         |           |                                                                                   |                  |      |           |
| AF220102                                         | Ilf3      | interleukin enhancer binding factor 3                                             | -3.25            | 0.95 | 5         |
| AF142629                                         | Ddx25     | DEAD (aspartate-glutamate-alanine-aspartate) box polypeptide 25                   | -1.61            | 0.39 | 5         |
| NM_012555                                        | Ets1      | v-ets erythroblastosis virus E26 oncogene homolog 1 (avian)                       | -1.53            | 0.35 | 4         |
| <b>Signal transduction activity</b>              |           |                                                                                   |                  |      |           |
| NM_012704                                        | Ptger3    | prostaglandin E receptor 3                                                        | -2.48            | 1.23 | 5         |
| Y15054                                           | Loc192276 | tumor specific antigen 70 kDa                                                     | -2.05            | 0.63 | 5         |
| U05784                                           | MPL3      | microtubule-associated proteins 1A/1B light chain 3                               | -1.98            | 0.90 | 5         |
| M11794                                           | Mt1a      | Metallothionein                                                                   | -1.83            | 0.63 | 5         |
| AF065438                                         | Ppicap    | peptidylprolyl isomerase C-associated protein                                     | -1.82            | 0.17 | 4         |
| M75153                                           | Rab11a    | RAB11a, member RAS oncogene family                                                | -1.79            | 0.64 | 5         |
| X03015                                           | Cd8a      | CD8 antigen, alpha chain                                                          | -1.78            | 0.69 | 4         |
| NM_017294                                        | Pacsin1   | protein kinase C and casein kinase substrate in neurons 1                         | -1.63            | 0.72 | 5         |
| NM_017057                                        | Tnp2      | transition protein 2                                                              | -1.63            | 0.51 | 4         |
| NM_019256                                        | P2rx7     | purinergic receptor P2X, ligand-gated ion channel, 7                              | -1.60            | 0.51 | 4         |
| <b>Proliferation/differentiation/development</b> |           |                                                                                   |                  |      |           |
| D50558                                           | Cd86      | CD86 antigen                                                                      | -6.06            | 2.57 | 5         |
| NM_012676                                        | Tnnt2     | troponin T2                                                                       | -2.64            | 0.49 | 5         |
| AJ001043                                         | C4.4a     | GPI-anchored metastasis-associated protein homolog                                | -2.18            | 0.48 | 4         |
| M58404                                           | Tmsb10    | thymosin, beta 10                                                                 | -2.17            | 0.56 | 5         |
| AF022952                                         | Vegfb     | vascular endothelial growth factor B                                              | -2.10            | 0.44 | 4         |
| U66470                                           | Cgr11     | cell growth regulatory with EF-hand domain                                        | -1.86            | 0.38 | 4         |
| M94721                                           |           | GAP-associated protein (p190).                                                    | -1.84            | 0.44 | 4         |
| AF034250                                         |           | Rattus norvegicus DD6G4-1 mRNA                                                    | -1.83            | 0.43 | 4         |

|                           |         |                                                                       |       |      |   |
|---------------------------|---------|-----------------------------------------------------------------------|-------|------|---|
| AF247002                  |         | Unknown mRNA                                                          | -1.74 | 0.55 | 4 |
| AF086630                  | Vapa    | vesicle-associated membrane protein, associated protein a             | -1.74 | 1.45 | 4 |
| U96637                    | Scya11  | small inducible cytokine subfamily A11                                | -1.73 | 0.60 | 4 |
| X07266                    |         | Rat gene 33                                                           | -1.62 | 0.57 | 4 |
| AF187065                  | Ngfrap1 | nerve growth factor receptor associated protein 1                     | -1.56 | 0.49 | 4 |
| M17523                    |         | peptide tyrosine-tyrosine (YY) mRNA                                   | -1.56 | 0.46 | 4 |
| U17035                    | Cxcl10  | chemokine (C-X-C motif) ligand 10                                     | -1.47 | 0.43 | 5 |
| <b>Transport</b>          |         |                                                                       |       |      |   |
| U76714                    | Slc39a1 | iron-regulated transporter, member 1                                  | -2.88 | 0.99 | 5 |
| L34049                    | Lrp2    | low density lipoprotein receptor-related protein 2                    | -2.22 | 0.84 | 5 |
| Z11994                    | Lrpap1  | low density lipoprotein receptor-related protein associated protein 1 | -2.09 | 0.39 | 5 |
| AF116896                  | Pdzk1   | PDZ domain containing 1                                               | -1.68 | 0.37 | 5 |
| NM_012977                 | Lgals9  | lectin, galactose binding, soluble 9                                  | -1.62 | 0.32 | 5 |
| <b>Translation</b>        |         |                                                                       |       |      |   |
| NM_020075                 | Eif5    | eukaryotic initiation factor 5 (eIF-5)                                | -1.91 | 0.69 | 5 |
| <b>Hormone metabolism</b> |         |                                                                       |       |      |   |
| NM_017154                 | Srd5a2  | steroid 5-alpha-reductase 2                                           | -2.06 | 0.63 | 5 |
| NM_017265                 | Hsd3b1  | 3beta-hydroxysteroid dehydrogenase 1                                  | -2.01 | 0.93 | 5 |

Table 2A shows downregulated genes that changed by more than 1.5 fold in at least four of five samples. Values are mean  $\pm$  SE for each gene;  $n = 5$ . Negative values indicate the fold decrease in the expression of a gene in 20d old HG-perfused compared with 10d old HG-perfused intestine
