# Supplementary material
Source: PubMed Central journal article supplement (PMC2194616)
Supplement: endo_en.2007-0906_3.pdf [file endo_en.2007-0906_3.pdf]

**Table 3A.** Microarray results of intestinal genes differentially upregulated, under glucose and fructose perfusion, between 20d and 10d old pups

| Access number                                    | symbol      | name and function                                       | 20F vs 10F       |       |   | 20G vs 10G       |      |   |
|--------------------------------------------------|-------------|---------------------------------------------------------|------------------|-------|---|------------------|------|---|
|                                                  |             |                                                         | Mean fold change | SE    | F | Mean fold change | SE   | F |
| <b>Metabolism</b>                                |             |                                                         |                  |       |   |                  |      |   |
| NM_012771                                        | Lyz         | lysozyme                                                | 4.60             | 4.60  | 5 | 3.60             | 2.04 | 4 |
| NM_019370                                        | LOC54410    | alkaline phosphodiesterase                              | 4.36             | 0.70  | 5 | 4.90             | 0.73 | 5 |
| X59737                                           | Ckmt1       | creatine kinase, mitochondrial 1, ubiquitous            | 4.12             | 1.73  | 5 | 4.49             | 1.90 | 5 |
| NM_012554                                        | Eno1        | enolase 1, alpha                                        | 2.81             | 1.21  | 5 | 2.60             | 1.44 | 5 |
| M29853                                           | Cyp4b1      | cytochrome P450, subfamily 4B, polypeptide 1            | 2.58             | 1.92  | 4 | 4.57             | 2.21 | 5 |
| X15800                                           | Pkm2        | pyruvate kinase, muscle                                 | 2.49             | 1.00  | 4 | 2.90             | 1.27 | 4 |
| NM_012839                                        | Cyca        | cytochrome c, somatic                                   | 2.37             | 0.59  | 4 | 2.25             | 0.54 | 5 |
| D38381                                           | Cyp3a18     | cytochrome P450, 3a18                                   | 2.35             | 0.61  | 4 | 2.29             | 0.42 | 5 |
| M63662                                           | rPAM-4 type | Peptidylglycine alpha-amidating monooxygenase           | 2.24             | 0.40  | 5 | 3.99             | 1.82 | 5 |
| NM_017025                                        | Ldha        | lactate dehydrogenase A                                 | 2.12             | 0.25  | 5 | 2.33             | 0.40 | 5 |
| NM_012570                                        | Glud1       | glutamate dehydrogenase 1                               | 1.96             | 0.43  | 5 | 2.28             | 0.51 | 5 |
| M31788                                           | Pgk1        | phosphoglycerate kinase 1                               | 1.94             | 0.51  | 4 | 2.60             | 0.78 | 5 |
| NM_017201                                        | Ahcy        | S-adenosylhomocysteine hydrolase                        | 1.87             | 0.48  | 4 | 1.81             | 0.29 | 4 |
| AB049189                                         | St14        | membrane bound arginine specific serine protease        | 1.74             | 0.19  | 4 | 2.39             | 0.72 | 4 |
| NM_017005                                        | Fh1         | fumarate hydratase 1                                    | 1.69             | 0.26  | 4 | 1.94             | 0.55 | 5 |
| S74321                                           |             | cytochrome bc-1 complex core P                          | 1.66             | 0.10  | 4 | 1.75             | 0.50 | 4 |
| <b>Nucleotide/DNA metabolism</b>                 |             |                                                         |                  |       |   |                  |      |   |
| U90888                                           | Ampd3       | adenosine monophosphate deaminase 3                     | 4.33             | 1.97  | 5 | 6.15             | 3.43 | 5 |
| AJ000347                                         | Bpnt1       | 3(2),5-bisphosphate nucleotidase                        | 2.36             | 0.30  | 4 | 2.54             | 0.39 | 5 |
| D85035                                           | Dpyd        | dihydropyrimidine dehydrogenase                         | 1.94             | 0.37  | 4 | 1.75             | 0.34 | 4 |
| <b>Drug metabolism</b>                           |             |                                                         |                  |       |   |                  |      |   |
| NM_012792                                        | Fmo1        | flavin containing monooxygenase 1                       | 3.03             | 0.51  | 5 | 3.30             | 1.29 | 5 |
| L19998                                           | Sult1a1     | sulfotransferase family 1A, phenol-preferring, member 1 | 2.81             | 2.22  | 5 | 2.98             | 1.49 | 5 |
| NM_017272                                        | Aldh1a4     | aldehyde dehydrogenase family 1, subfamily A4           | 2.11             | 0.34  | 5 | 1.85             | 0.44 | 4 |
| NM_013215                                        | Afar        | aflatoxin B1 aldehyde reductase                         | 2.05             | 0.54  | 5 | 1.74             | 0.56 | 4 |
| <b>Signal transduction activity</b>              |             |                                                         |                  |       |   |                  |      |   |
| NM_031654                                        | Rabggt1     | Rab geranylgeranyl transferase, a subunit               | 2.11             | 0.63  | 5 | 1.73             | 0.37 | 4 |
| NM_013106                                        | Gnai3       | guanine nucleotide binding protein, alpha inhibiting 3  | 1.97             | 0.34  | 4 | 2.34             | 0.53 | 5 |
| <b>Development/proliferation/differentiation</b> |             |                                                         |                  |       |   |                  |      |   |
| AF161715                                         | Nphs1       | nephrin                                                 | 3.31             | 1.79  | 5 | 2.94             | 1.35 | 4 |
| U66461                                           | Pin         | dynein, cytoplasmic, light chain 1                      | 3.06             | 1.050 | 5 | 4.04             | 1.18 | 5 |

|                              |           |                                                                      |      |      |   |      |      |   |
|------------------------------|-----------|----------------------------------------------------------------------|------|------|---|------|------|---|
| L11995                       | Ccnb1     | cyclin B1                                                            | 2.84 | 0.93 | 5 | 3.07 | 0.62 | 5 |
| M63665                       | Krt21     | cytokeratin 21                                                       | 2.72 | 0.98 | 4 | 2.34 | 0.79 | 4 |
| AF007890                     | LOC246267 | resection-induced TPI (rs11)                                         | 2.15 | 0.43 | 5 | 2.13 | 1.03 | 4 |
| M64388                       | Olf41     | olfactory receptor 41                                                | 2.14 | 0.24 | 4 | 2.09 | 0.40 | 5 |
| U24174                       | Cdkn1a    | cyclin-dependent kinase inhibitor 1A                                 | 1.99 | 0.32 | 4 | 2.00 | 0.59 | 4 |
| AF031483                     | Hfb2      | Hfb2 protein                                                         | 1.65 | 0.12 | 4 | 1.67 | 0.53 | 4 |
| <b>Transport</b>             |           |                                                                      |      |      |   |      |      |   |
| NM_013033                    | Slc5a1    | sodium/glucose cotransporter (SGLT1)                                 | 2.61 | 0.48 | 5 | 2.68 | 0.31 | 4 |
| NM_012653                    | Slc9a2    | solute carrier family 9, member 2                                    | 2.39 | 0.38 | 5 | 2.93 | 0.60 | 5 |
| U36992                       | Cyp7b1    | cytochrome P450, subfamily 7B, polypeptide 1                         | 2.15 | 0.57 | 5 | 2.27 | 0.19 | 5 |
| D12771                       | Slc25a5   | solute carrier family 25 member 5                                    | 2.03 | 0.4  | 4 | 1.69 | 0.50 | 5 |
| AJ223355                     | Slc25a10  | dicarboxylate transporter                                            | 1.99 | 0.50 | 5 | 2.08 | 0.34 | 5 |
| J02627                       | Cyp2e1    | cytochrome P450, subfamily 2E, polypeptide 1                         | 1.87 | 0.12 | 5 | 2.16 | 0.47 | 5 |
| AJ238278                     | Xpo1      | exportin 1 (CRM1, yeast, homolog)                                    | 1.72 | 0.32 | 4 | 2.01 | 0.30 | 4 |
| <b>Translation</b>           |           |                                                                      |      |      |   |      |      |   |
| AJ005161                     |           | Rattus rattus mRNA for mitochondrial translational elongation factor | 1.82 | 0.41 | 4 | 2.18 | 0.66 | 5 |
| J01877                       |           | ribosomal RNA                                                        | 1.69 | 0.37 | 4 | 2.24 | 0.25 | 5 |
| <b>Hormone metabolism</b>    |           |                                                                      |      |      |   |      |      |   |
| NM_017081                    | Hsd11b2   | hydroxysteroid 11-beta dehydrogenase 2                               | 3.69 | 2.24 | 5 | 3.84 | 1.35 | 5 |
| S68284                       |           | progesterin receptor form B                                          | 2.28 | 0.97 | 5 | 3.62 | 2.44 | 5 |
| NM_017363                    | Csh1      | chorionic somatomammotropin hormone 1                                | 1.92 | 0.42 | 4 | 2.25 | 0.91 | 4 |
| U10188                       | Plk       | polo-like kinase homolog (Drosophila)                                | 1.88 | 0.37 | 4 | 2.19 | 0.76 | 4 |
| <b>Immunity/inflammation</b> |           |                                                                      |      |      |   |      |      |   |
| U32681                       | Dmbt1     | ebnerin                                                              | 3.42 | 1.57 | 5 | 3.90 | 1.45 | 5 |
| AF120100                     |           | thiopurine S-methyltransferase                                       | 2.17 | 0.53 | 5 | 2.77 | 1.21 | 4 |
| <b>Unknown</b>               |           |                                                                      |      |      |   |      |      |   |
| AF010434                     |           | Rattus norvegicus MARRLC9B mRNA, partial cds                         | 3.86 | 3.57 | 5 | 4.55 | 3.70 | 5 |
| U25148                       | Myh1      | myosin, heavy polypeptide-like                                       | 3.24 | 0.75 | 5 | 4.05 | 0.87 | 5 |
| AF156554                     | Myh1      | myosin, heavy polypeptide-like                                       | 2.70 | 1.08 | 5 | 4.03 | 1.37 | 5 |
| AF010437                     |           | Rattus norvegicus MARRLC2A mRNA, partial cds                         | 2.24 | 1.06 | 4 | 2.22 | 0.91 | 4 |
| NM_017187                    | Hmgb2     | high mobility group box 2                                            | 2.09 | 0.30 | 4 | 2.29 | 1.41 | 5 |
| K02598                       | Csn10     | casein kappa                                                         | 1.81 | 0.33 | 4 | 2.17 | 0.63 | 5 |
| U12526                       |           | Ultraviolet B radiation-activated UV96 mRNA, partial sequence        | 1.72 | 0.28 | 4 | 2.01 | 0.59 | 5 |

Table 3A shows genes upregulated that changed by more than 1.5 fold and less than 5 fold in at least four of five samples under glucose or fructose perfusion mean  $\pm$  SE for each gene;  $n = 5$  experiments. F = frequency. Values of the “20F vs 10F” column indicate the fold increase in the expression of a gene in 20 d old F-perfused compared with 10 d old F-perfused intestine. Values of the “20G vs 10G” column indicate the fold increase in the expression of a gene in 20 d old G-perfused compared with 10 d old G-perfused intestine.
