# Supplementary material
Source: PubMed Central journal article supplement (PMC2194616)
Supplement: endo_en.2007-0906_4.pdf [file endo_en.2007-0906_4.pdf]

**Table 4A.** Microarray results of intestinal genes differentially downregulated, under glucose and fructose perfusion, between 20d and 10d old pups

| No access                                                | symbol    | name and function                                                 | 20F vs 10F       |   | 20G vs 10G       |   |
|----------------------------------------------------------|-----------|-------------------------------------------------------------------|------------------|---|------------------|---|
|                                                          |           |                                                                   | Mean fold change | F | Mean fold change | F |
| <b>Metabolism</b>                                        |           |                                                                   |                  |   |                  |   |
| NM_017015                                                | Gusb      | glucuronidase, beta                                               | -3.23            | 5 | -3.70            | 5 |
| U67915                                                   | Mcpt1     | mast cell protease 1                                              | -3.13            | 5 | -2.44            | 5 |
| NM_017320                                                | Ctss      | cathepsin S                                                       | -3.03            | 4 | -4.17            | 4 |
| AF102262                                                 | B4galt1   | UDP-Gal:betaGlcNAc beta 1,4- galactosyltransferase, polypeptide 1 | -2.78            | 5 | -2.22            | 5 |
| AB033418                                                 | Slc2a8    | Type 8 facilitated glucose transporter (GLUT8)                    | -2.70            | 5 | -3.45            | 5 |
| AB009372                                                 | LOC246266 | lysophospholipase                                                 | -2.70            | 4 | -2.63            | 4 |
| X73911                                                   | Abp1      | amiloride binding protein 1                                       | -2.63            | 4 | -3.45            | 5 |
| X82396                                                   | Ctsb      | cathepsin B                                                       | -2.63            | 5 | -2.38            | 4 |
| X16957                                                   | Cst3      | cystatin C                                                        | -2.56            | 5 | -2.78            | 5 |
| NM_017351                                                | PAIHC3    | pre-alpha-inhibitor, heavy chain 3                                | -2.50            | 4 | -2.56            | 4 |
| D49434                                                   | Arsb      | arylsulfatase B                                                   | -2.44            | 4 | -3.45            | 5 |
| X54467                                                   | Ctsd      | cathepsin D                                                       | -2.33            | 4 | -2.86            | 4 |
| M32247                                                   | Serpina1  | serine (or cysteine) proteinase inhibitor, clade A, member 1      | -2.33            | 5 | -2.13            | 4 |
| NM_013098                                                | G6pc      | glucose-6-phosphatase, catalytic                                  | -2.22            | 5 | -4.76            | 5 |
| S81497                                                   | Lipa      | lipase A, lysosomal acid                                          | -2.22            | 5 | -2.56            | 5 |
| M13979                                                   | Slc2a1    | Type 1 glucose transporter (GLUT1)                                | -2.17            | 5 | -2.86            | 4 |
| NM_017143                                                | F10       | coagulation factor 10                                             | -2.17            | 4 | -2.56            | 4 |
| D87240                                                   | Pfkfb3    | 6-phosphofructo-2-kinase/fructose-2,6-biphosphatase 3             | -1.96            | 4 | -2.33            | 4 |
| AF186469                                                 | Tm6p1     | fasting-inducible integral membrane protein TM6P1                 | -1.89            | 5 | -1.92            | 5 |
| D87671                                                   | Tip120A   | TBP-interacting protein 120A                                      | -1.79            | 4 | -1.64            | 5 |
| NM_019291                                                | Ca2       | carbonic anhydrase 2                                              | -1.75            | 4 | -2.04            | 4 |
| AF095449                                                 | Hadhsc    | L-3-hydroxyacyl-Coenzyme A dehydrogenase, short chain             | -1.64            | 4 | -1.72            | 4 |
| X15551                                                   |           | beta-2 glycoprotein                                               | -1.56            | 4 | -1.75            | 4 |
| X63515                                                   | Pygl      | liver glycogen phosphorylase                                      | -1.54            | 4 | -2.04            | 4 |
| <b>Transcription regulation DNA binding/ RNA binding</b> |           |                                                                   |                  |   |                  |   |
| AF250142                                                 | Nucb2     | NEFA precursor                                                    | -2.04            | 5 | -2.22            | 4 |
| U77931                                                   | LOC257642 | rRNA promoter binding protein                                     | -2.13            | 4 | -2.50            | 5 |
| Z36277                                                   | Nucb      | nucleobindin                                                      | -1.89            | 4 | -2.04            | 4 |
| AF090306                                                 | Rbbp7     | retinoblastoma binding protein 7                                  | -1.82            | 4 | -1.82            | 5 |
| <b>Signal transduction</b>                               |           |                                                                   |                  |   |                  |   |
| NM_017079                                                | Cd1d1     | CD1d1 antigen                                                     | -2.86            | 5 | -3.70            | 5 |
| AF276940                                                 | Entpd2    | ectonucleoside triphosphate diphosphohydrolase 2                  | -2.78            | 5 | -1.89            | 4 |
| S68809                                                   | S100a1    | S100 calcium binding protein A1                                   | -2.56            | 4 | -3.85            | 5 |
| NM_017113                                                | Grn       | granulin                                                          | -2.44            | 4 | -2.50            | 4 |

|                                                  |         |                                                             |       |   |       |   |
|--------------------------------------------------|---------|-------------------------------------------------------------|-------|---|-------|---|
| U18374                                           | Nr1h4   | nuclear receptor subfamily 1, group H, member 4             | -2.38 | 4 | -2.63 | 5 |
| AF030243                                         | Cyrl    | cytokine receptor-like protein CYRL                         | -2.33 | 4 | -2.50 | 5 |
| L19699                                           | Ralb    | v-ral simian leukemia viral oncogene homolog B              | -2.33 | 5 | -2.08 | 4 |
| AB000928                                         | Zp1     | zona pellucida glycoprotein 1                               | -2.33 | 5 | -2.08 | 4 |
| X14066                                           | App     | amyloid beta (A4) precursor protein                         | -2.27 | 4 | -3.33 | 4 |
| X96663                                           | Rab29   | Ras-related GTP-binding protein Rab29                       | -2.04 | 4 | -2.86 | 4 |
| X14834                                           | Igf2    | insulin-like growth factor 2                                | -2.04 | 4 | -2.00 | 4 |
| X07648                                           |         | amyloid protein                                             | -2.00 | 5 | -2.56 | 4 |
| AF118816                                         | Rdc1    | chemokine orphan receptor 1                                 | -2.00 | 4 | -2.00 | 5 |
| U42411                                           | Prkab1  | protein kinase, AMP-activated, beta 1 non-catalytic subunit | -2.00 | 4 | -1.89 | 4 |
| AJ131111                                         | Lancl1  | lanC (bacterial lantibiotic synthetase component C)-like 1  | -1.96 | 5 | -2.22 | 5 |
| AB000199                                         | Cca2    | CCA2 protein                                                | -1.89 | 4 | -1.92 | 4 |
| NM_017181                                        | Fah     | fumarylacetoacetate hydrolase                               | -1.82 | 4 | -2.63 | 4 |
| M31495                                           | Sct     | secretin                                                    | -1.82 | 4 | -2.27 | 4 |
| NM_012588                                        | Igfbp3  | insulin-like growth factor binding protein 3                | -1.82 | 5 | -2.00 | 5 |
| U35775                                           | Add3    | adducin 3, gamma                                            | -1.75 | 5 | -1.85 | 4 |
| S61973                                           | Grina   | NMDA receptor glutamate-binding chain                       | -1.72 | 4 | -2.22 | 4 |
| X76489                                           | Cd9     | CD9 antigen                                                 | -1.69 | 4 | -2.78 | 4 |
| X52835                                           | F2      | coagulation factor 2                                        | -1.69 | 5 | -2.13 | 5 |
| AF022087                                         | Gng2    | guanine nucleotide binding protein, gamma 2                 | -1.54 | 5 | -2.86 | 5 |
| <b>Development/proliferation/differentiation</b> |         |                                                             |       |   |       |   |
| NM_019290                                        | Btg3    | B-cell translocation gene 3                                 | -2.38 | 5 | -3.03 | 5 |
| AB025023                                         | Mdk     | midkine                                                     | -2.08 | 5 | -2.08 | 5 |
| AF221952                                         | Mucdhl  | mucin and cadherin-like                                     | -1.89 | 4 | -2.56 | 5 |
| M12725                                           | Pva     | parvalbumin                                                 | -1.69 | 4 | -2.17 | 4 |
| <b>Hormones metabolism</b>                       |         |                                                             |       |   |       |   |
| X57999                                           | Dio1    | deiodinase, iodothyronine, type I                           | -4.00 | 5 | -4.76 | 4 |
| NM_012661                                        | Sts     | steroid sulfatase                                           | -1.89 | 4 | -1.79 | 4 |
| <b>Translation and protein maturation</b>        |         |                                                             |       |   |       |   |
| NM_017068                                        | Lamp2   | lysosomal membrane glycoprotein 2                           | -2.94 | 5 | -3.85 | 4 |
| U85512                                           | Gchfr   | GTP cyclohydrolase I feedback regulatory protein            | -1.96 | 5 | -2.50 | 5 |
| AJ301677                                         | Mlp     | MARCKS-like protein                                         | -1.92 | 4 | -1.67 | 4 |
| X17611                                           | Alpi    | Alkaline phosphatase 1, intestinal, defined by SSR          | -1.92 | 4 | -2.38 | 4 |
| <b>Transport</b>                                 |         |                                                             |       |   |       |   |
| Z67744                                           | Clcn7   | chloride channel 7                                          | -2.63 | 4 | -1.96 | 5 |
| M31178                                           | Calb1   | calbindin 1                                                 | -2.50 | 4 | -2.94 | 4 |
| NM_017217                                        | Slc7a3  | amino acid transporter                                      | -2.50 | 5 | -2.86 | 4 |
| D85100                                           | Slc27a2 | fatty acid transporter                                      | -2.00 | 4 | -3.03 | 5 |
| U18729                                           | Cyba    | cytochrome b558 alpha-subunit                               | -1.92 | 4 | -2.08 | 5 |
| NM_017125                                        | Cd63    | CD63 antigen                                                | -1.89 | 4 | -2.44 | 4 |
| M31155                                           | Prlpb   | prolactin-like protein B                                    | -1.89 | 4 | -2.08 | 5 |
| AF054810                                         | Tcn2p   | transcobalamin II precursor                                 | -1.85 | 4 | -2.27 | 4 |

|                     |         |                                              |       |   |       |   |
|---------------------|---------|----------------------------------------------|-------|---|-------|---|
| AF170253            | Slpa    | septin-like protein                          | -1.82 | 5 | -1.92 | 4 |
| NM_019269           | Slc22a5 | carnitine/organic cation transporter         | -1.79 | 5 | -2.33 | 4 |
| NM_017277           | Ap1b1   | adaptor protein complex AP-1, beta 1 subunit | -1.64 | 4 | -2.08 | 5 |
| AB020520            | Slc7a7  | cationic amino acid transporter              | -1.56 | 4 | -1.79 | 4 |
| <b>Unclassified</b> |         |                                              |       |   |       |   |
| AF110026            | Map17   | membrane-associated protein 17               | -3.03 | 5 | -4.55 | 5 |
| AF214733            | Upa     | uterine-specific proline-rich acidic protein | -2.78 | 5 | -3.13 | 5 |
| AF053094            | Cdkn1c  | cyclin-dependent kinase inhibitor 1C, p57    | -2.50 | 4 | -4.35 | 5 |
| AF152002            |         | hypothetical gene supported by AF152002      | -2.00 | 5 | -2.17 | 4 |
| S79797              | Gcnt1   | enzymatic glycosylation-regulating gene      | -1.67 | 4 | -2.04 | 4 |
| NM_012857           | Lamp1   | lysosomal membrane glycoprotein 1            | -1.61 | 4 | -1.89 | 4 |

Table 4A shows genes downregulated that changed by more than 1.5 fold and less than 5 fold in at least four of five samples under glucose or fructose perfusion. Values are mean  $\pm$  SE for each gene; n = 5 experiments. Negative values of the “20F vs 10F” column indicate the fold decrease in the expression of a gene in 20 d old F-perfused compared with 10 d old F-perfused intestine. Values of the “20G vs 10G” column indicate the fold decrease in the expression of a gene in 20 d old G-perfused compared with 10 d old G-perfused intestine.
